# Supplementary material for: Droughts in Bern and Rouen from the 14th to the beginning of the 18th century derived from documentary evidence
Source: Copernicus journal article supplement (doi:10.5194/cp-16-2173-2020), 2020-11-12
Supplement: Supplementary file 1 [file cp-16-2173-2020-supplement.zip]

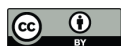

## *Supplement of*

# **Droughts in Bern and Rouen from the 14th to the beginning of the 18th century derived from documentary evidence**

**Chantal Camenisch and Melanie Salvisberg**

*Correspondence to:* Chantal Camenisch ([chantal.camenisch@hist.unibe.ch](mailto:chantal.camenisch@hist.unibe.ch))

- [cp-16-2173-2020-supplement-title-page.pdf](#)
- [Dataset\\_Drought\\_Camenisch\\_Salvisberg\\_2020.xlsx](#)

The copyright of individual parts of the supplement might differ from the CC BY 4.0 License.
